# Supplementary material
Source: publisher site journal article supplement (https://www.dovepress.com/article/supplementary_file/567066/567066%20Supplementary%20Material.docx)
Supplement: Supplementary file 1 [file 567066%20Supplementary%20Material.docx]

# Supplementary Material

***Supplementary Table 1***

*Grading guidelines for each clinical manifestation.*

| **Clinical manifestation** | **Grading** |
| --- | --- |
| **Constipation** | 0 = no, 1 = yes |
| **Coughing** | 0 = no, 1 = mild, 2 = moderate (limiting IADL), 3 = severe (limiting ADL) |
| **Diarrhea** | 0 = no, 1 = yes |
| **Dyspnea** | 0 = no, 1 = mild (not limiting IADL), 2 = moderate (limiting IADL), 3 = severe (limiting ADL), 4 = life-threatening, 5 = death |
| **Fatigue** | 0 = no, 1 = mild, 2 = moderate (limiting IADL), 3 = severe (limiting ADL) |
| **Headache** | 0 = no, 1 = mild, 2 = moderate (limiting IADL), 3 = severe (limiting ADL) |
| **Hemoptysis** | 0 = no, 1 = yes |
| **Hoarseness** | 0 = no, 1 = yes |
| **Nausea** | 0 = no, 1 = mild, 2 = moderate, 3 = severe with weight loss |
| **Pain** | 0 = no, 1 = mild, 2 = moderate (limiting IADL), 3 = severe (limiting ADL) |
| **Weight loss** | 0 = no, 1 = yes |

Each clinical manifestation was graded with inspiration from the CTCAE.8 Some clinical manifestations were graded using Instrumental Activity of Daily Living (IADL) and Activity of Daily Living (ADL).17**Supplementary Table 2**

*SKS-codes used to identify clinical manifestations.*

| **Clinical manifestations** | **Codes** |
| --- | --- |
| Constipation | DK590 |
| Coughing | DR05, DR059 |
| Diarrhea | DK529B1, DK529B, DK591 |
| Dyspnea | DR060, DR061 |
| Fatigue | DT983D5, DR539, DR539A, DR688A9B1 |
| Headache | DR51, DR519, DG44 |
| Hemoptysis | DR042 |
| Hoarseness | DR490A, DR490 |
| Nausea | DR119, DR119B |
| Pain | DR529, DR52, DR520, DR521, DR521A, DR521B, DR522, DR522E, DR07, DM545, DM546, DM549, DR071, DR072, DR073, DR074, DT983D4, DM796, DM255 |
| Weight loss | DR634, DR649 |

***Supplementary Table 3***

*Results on patient level.*

| **Clinical manifestations** | **From PAS** | **From journal** | **Matched** | **Precision** | **Recall** | **F1 score** |
| --- | --- | --- | --- | --- | --- | --- |
| **Constipation** | 4 | 41 | 0 | 0.00 | 0.00 | 0.00 |
| **Coughing** | 3 | 83 | 3 | 1.00 | 0.04 | 0.07 |
| **Diarrhea** | 4 | 36 | 3 | 0.75 | 0.08 | 0.15 |
| **Dyspnea** | 37 | 84 | 35 | 0.95 | 0.42 | 0.58 |
| **Fatigue** | 5 | 91 | 4 | 0.80 | 0.04 | 0.08 |
| **Headache** | 1 | 29 | 1 | 1.00 | 0.03 | 0.07 |
| **Hemoptysis** | 4 | 17 | 3 | 0.75 | 0.18 | 0.29 |
| **Hoarseness** | 1 | 24 | 0 | 0.00 | 0.00 | 0.00 |
| **Nausea** | 9 | 50 | 7 | 0.78 | 0.14 | 0.24 |
| **Pain** | 23 | 84 | 21 | 0.91 | 0.25 | 0.39 |
| **Weight loss** | 1 | 72 | 0 | 0.00 | 0.00 | 0.00 |

***Supplementary Table 4***

*Results on year level.*

| **Clinical manifestations** | **From PAS** | **From journal** | **Matched** | **Precision** | **Recall** | **F1 score** |
| --- | --- | --- | --- | --- | --- | --- |
| **Constipation** | 4 | 51 | 0 | 0.00 | 0.00 | 0.00 |
| **Coughing** | 3 | 142 | 3 | 1.00 | 0.02 | 0.04 |
| **Diarrhea** | 4 | 51 | 3 | 0.75 | 0.06 | 0.11 |
| **Dyspnea** | 40 | 157 | 34 | 0.85 | 0.22 | 0.35 |
| **Fatigue** | 5 | 165 | 2 | 0.40 | 0.01 | 0.02 |
| **Headache** | 4 | 22 | 3 | 0.75 | 0.14 | 0.23 |
| **Hemoptysis** | 1 | 38 | 1 | 1.00 | 0.03 | 0.05 |
| **Hoarseness** | 1 | 27 | 0 | 0.00 | 0.00 | 0.00 |
| **Nausea** | 9 | 73 | 7 | 0.78 | 0.10 | 0.17 |
| **Pain** | 27 | 146 | 22 | 0.81 | 0.15 | 0.25 |
| **Weight loss** | 1 | 106 | 0 | 0.00 | 0.00 | 0.00 |

***Supplementary Table 5***

*Results on quarter level.*

| **Clinical manifestations** | **From PAS** | **From journal** | **Matched** | **Precision** | **Recall** | **F1 score** |
| --- | --- | --- | --- | --- | --- | --- |
| **Constipation** | 5 | 57 | 0 | 0.00 | 0.00 | 0.00 |
| **Coughing** | 3 | 195 | 3 | 1.00 | 0.02 | 0.03 |
| **Diarrhea** | 4 | 62 | 3 | 0.75 | 0.05 | 0.09 |
| **Dyspnea** | 45 | 241 | 38 | 0.84 | 0.16 | 0.27 |
| **Fatigue** | 5 | 273 | 1 | 0.20 | 0.00 | 0.01 |
| **Headache** | 4 | 26 | 3 | 0.75 | 0.12 | 0.20 |
| **Hemoptysis** | 1 | 50 | 1 | 1.00 | 0.02 | 0.04 |
| **Hoarseness** | 1 | 33 | 0 | 0.00 | 0.00 | 0.00 |
| **Nausea** | 10 | 92 | 7 | 0.70 | 0.08 | 0.14 |
| **Pain** | 31 | 219 | 23 | 0.74 | 0.11 | 0.18 |
| **Weight loss** | 1 | 127 | 0 | 0.00 | 0.00 | 0.00 |
